# Supplementary material for: The association between diet and mental health and wellbeing in young adults within a biopsychosocial framework
Source: PubMed Central journal article supplement (PMC8174719; doi:10.1371/journal.pone.0252358), 2021-06-03

# PLOS ONE

## The association between diet and mental health and wellbeing in young adults within a biopsychosocial framework --Manuscript Draft--

|                                                                                                                                                                                                                            |                                                                                                                                                                                                                                                                                                                                                                                                                                                                                                                                                                                                                                                                                                                                                                                                                                                                                                                                                                                                                                                                                                                                                                                                                                                                                                                                                                                                                                                                                                                                                                                                                                                                                                                                                                                                                                                                                                                                                                                                                                                                                                                           |
|----------------------------------------------------------------------------------------------------------------------------------------------------------------------------------------------------------------------------|---------------------------------------------------------------------------------------------------------------------------------------------------------------------------------------------------------------------------------------------------------------------------------------------------------------------------------------------------------------------------------------------------------------------------------------------------------------------------------------------------------------------------------------------------------------------------------------------------------------------------------------------------------------------------------------------------------------------------------------------------------------------------------------------------------------------------------------------------------------------------------------------------------------------------------------------------------------------------------------------------------------------------------------------------------------------------------------------------------------------------------------------------------------------------------------------------------------------------------------------------------------------------------------------------------------------------------------------------------------------------------------------------------------------------------------------------------------------------------------------------------------------------------------------------------------------------------------------------------------------------------------------------------------------------------------------------------------------------------------------------------------------------------------------------------------------------------------------------------------------------------------------------------------------------------------------------------------------------------------------------------------------------------------------------------------------------------------------------------------------------|
| <b>Manuscript Number:</b>                                                                                                                                                                                                  | PONE-D-20-39899                                                                                                                                                                                                                                                                                                                                                                                                                                                                                                                                                                                                                                                                                                                                                                                                                                                                                                                                                                                                                                                                                                                                                                                                                                                                                                                                                                                                                                                                                                                                                                                                                                                                                                                                                                                                                                                                                                                                                                                                                                                                                                           |
| <b>Article Type:</b>                                                                                                                                                                                                       | Research Article                                                                                                                                                                                                                                                                                                                                                                                                                                                                                                                                                                                                                                                                                                                                                                                                                                                                                                                                                                                                                                                                                                                                                                                                                                                                                                                                                                                                                                                                                                                                                                                                                                                                                                                                                                                                                                                                                                                                                                                                                                                                                                          |
| <b>Full Title:</b>                                                                                                                                                                                                         | The association between diet and mental health and wellbeing in young adults within a biopsychosocial framework                                                                                                                                                                                                                                                                                                                                                                                                                                                                                                                                                                                                                                                                                                                                                                                                                                                                                                                                                                                                                                                                                                                                                                                                                                                                                                                                                                                                                                                                                                                                                                                                                                                                                                                                                                                                                                                                                                                                                                                                           |
| <b>Short Title:</b>                                                                                                                                                                                                        | Diet and mental health in a biopsychosocial framework                                                                                                                                                                                                                                                                                                                                                                                                                                                                                                                                                                                                                                                                                                                                                                                                                                                                                                                                                                                                                                                                                                                                                                                                                                                                                                                                                                                                                                                                                                                                                                                                                                                                                                                                                                                                                                                                                                                                                                                                                                                                     |
| <b>Corresponding Author:</b>                                                                                                                                                                                               | Verena Rossa-Roccor, MD, MSc<br>The University of British Columbia<br>Vancouver, CANADA                                                                                                                                                                                                                                                                                                                                                                                                                                                                                                                                                                                                                                                                                                                                                                                                                                                                                                                                                                                                                                                                                                                                                                                                                                                                                                                                                                                                                                                                                                                                                                                                                                                                                                                                                                                                                                                                                                                                                                                                                                   |
| <b>Keywords:</b>                                                                                                                                                                                                           | Depression; anxiety; quality of life; dietary patterns; plant-based diets; planetary health                                                                                                                                                                                                                                                                                                                                                                                                                                                                                                                                                                                                                                                                                                                                                                                                                                                                                                                                                                                                                                                                                                                                                                                                                                                                                                                                                                                                                                                                                                                                                                                                                                                                                                                                                                                                                                                                                                                                                                                                                               |
| <b>Abstract:</b>                                                                                                                                                                                                           | <p><b>Objective:</b> Predominantly plant-based diets can co-benefit human physical health and the planet. Young adults appear to be on the forefront of the shift to plant-based diets. However, little is known about the relationship between plant-based diets and mental health in this population even though mental health disorders contribute substantially to the global burden of disease, particularly among this age group.</p> <p><b>Design:</b> In this cross-sectional study we utilize a biopsychosocial framework to assess the association between dietary intake and mental health and wellbeing. Mental health was assessed using self-reported measures of anxiety (GAD-7), depression (PHQ-9) and quality of life (single-item). Dietary intake in the prior month was assessed using a dietary screener (DSQ) and participants were asked to self-identify a diet preference (e.g., vegan).</p> <p><b>Setting and participants:</b> 339 university undergraduate students.</p> <p><b>Results:</b> A principle component analysis of dietary intake found three dominant dietary patterns (plant-based, animal-based, and 'junk foods'); 28.1% (n=95) of participants self-identified as pescatarian, vegetarian, vegan, other. The association between dietary patterns, diet preference and mental health was assessed through regression analysis. After controlling for covariables, we found a significant positive association between the junk food component and depression (z-score <math>\beta=.21</math>, <math>p\leq.001</math>; adj. <math>R^2=.39</math>) and anxiety (z-score <math>\beta=.14</math>; <math>p\leq.001</math>; adj. <math>R^2=.32</math>) while no association was found between plant-based, animal-based or self-identified diet preference and the mental health measures.</p> <p><b>Conclusions:</b> Predominantly plant-based diet patterns are not negatively associated with mental health and wellbeing. It is important to consider dietary composition and to conceptualize diet as a health behaviour that is embedded in a biopsychosocial framework.</p> |
| <b>Order of Authors:</b>                                                                                                                                                                                                   | Verena Rossa-Roccor, MD, MSc<br>Chris G Richardson<br>Rachel A Murphy<br>Anne M Gadermann                                                                                                                                                                                                                                                                                                                                                                                                                                                                                                                                                                                                                                                                                                                                                                                                                                                                                                                                                                                                                                                                                                                                                                                                                                                                                                                                                                                                                                                                                                                                                                                                                                                                                                                                                                                                                                                                                                                                                                                                                                 |
| <b>Additional Information:</b>                                                                                                                                                                                             |                                                                                                                                                                                                                                                                                                                                                                                                                                                                                                                                                                                                                                                                                                                                                                                                                                                                                                                                                                                                                                                                                                                                                                                                                                                                                                                                                                                                                                                                                                                                                                                                                                                                                                                                                                                                                                                                                                                                                                                                                                                                                                                           |
| <b>Question</b>                                                                                                                                                                                                            | <b>Response</b>                                                                                                                                                                                                                                                                                                                                                                                                                                                                                                                                                                                                                                                                                                                                                                                                                                                                                                                                                                                                                                                                                                                                                                                                                                                                                                                                                                                                                                                                                                                                                                                                                                                                                                                                                                                                                                                                                                                                                                                                                                                                                                           |
| <b>Financial Disclosure</b>                                                                                                                                                                                                | This research did not receive any specific grant from funding agencies in the public, commercial, or not-for-profit sectors. VR-R was the recipient of a Canadian Institutes of Health Research Canada Graduate Scholarships - Master's award during the duration of the study. RAM is supported by the Canadian Cancer Society (grant #704735) and the Michael Smith Foundation for Health Research (grant #17644). AMG gratefully acknowledges support from the Michael Smith Foundation for Health Research (grant # 17717). The funders had no role in study design, data collection and analysis,                                                                                                                                                                                                                                                                                                                                                                                                                                                                                                                                                                                                                                                                                                                                                                                                                                                                                                                                                                                                                                                                                                                                                                                                                                                                                                                                                                                                                                                                                                                    |
| Enter a financial disclosure statement that describes the sources of funding for the work included in this submission. Review the <a href="#">submission guidelines</a> for detailed requirements. View published research |                                                                                                                                                                                                                                                                                                                                                                                                                                                                                                                                                                                                                                                                                                                                                                                                                                                                                                                                                                                                                                                                                                                                                                                                                                                                                                                                                                                                                                                                                                                                                                                                                                                                                                                                                                                                                                                                                                                                                                                                                                                                                                                           |

articles from [PLOS ONE](#) for specific examples.

This statement is required for submission and **will appear in the published article** if the submission is accepted. Please make sure it is accurate.

#### Unfunded studies

Enter: *The author(s) received no specific funding for this work.*

#### Funded studies

Enter a statement with the following details:

- Initials of the authors who received each award
- Grant numbers awarded to each author
- The full name of each funder
- URL of each funder website
- Did the sponsors or funders play any role in the study design, data collection and analysis, decision to publish, or preparation of the manuscript?
- **NO** - Include this sentence at the end of your statement: *The funders had no role in study design, data collection and analysis, decision to publish, or preparation of the manuscript.*
- **YES** - Specify the role(s) played.

\* typeset

decision to publish, or preparation of the manuscript.

#### Competing Interests

Use the instructions below to enter a competing interest statement for this submission. On behalf of all authors, disclose any [competing interests](#) that could be perceived to bias this work—acknowledging all financial support and any other relevant financial or non-financial competing interests.

This statement **will appear in the published article** if the submission is accepted. Please make sure it is accurate. View published research articles from [PLOS ONE](#) for specific examples.

I have read the journal's policy and the authors of this manuscript have the following competing interests: The authors declare that they have no conflict of interest. RAM has received funds as a consultant from Pharmavite and research funds from the International Life Sciences Institute, North America. Neither relationship is relevant to the work presented in this manuscript.

**NO authors have competing interests**

Enter: *The authors have declared that no competing interests exist.*

**Authors with competing interests**

Enter competing interest details beginning with this statement:

*I have read the journal's policy and the authors of this manuscript have the following competing interests: [insert competing interests here]*

\* typeset

**Ethics Statement**

Enter an ethics statement for this submission. This statement is required if the study involved:

- Human participants
- Human specimens or tissue
- Vertebrate animals or cephalopods
- Vertebrate embryos or tissues
- Field research

Write "N/A" if the submission does not require an ethics statement.

General guidance is provided below. Consult the [submission guidelines](#) for detailed instructions. **Make sure that all information entered here is included in the Methods section of the manuscript.**

This study was conducted according to the guidelines laid down in the Declaration of Helsinki and all procedures involving research study participants were approved by the University of British Columbia Behavioural Research Ethics Board (review code H18-00442). Written informed consent was obtained from all participants.

**Format for specific study types**

**Human Subject Research (involving human participants and/or tissue)**

- Give the name of the institutional review board or ethics committee that approved the study
- Include the approval number and/or a statement indicating approval of this research
- Indicate the form of consent obtained (written/oral) or the reason that consent was not obtained (e.g. the data were analyzed anonymously)

**Animal Research (involving vertebrate animals, embryos or tissues)**

- Provide the name of the Institutional Animal Care and Use Committee (IACUC) or other relevant ethics board that reviewed the study protocol, and indicate whether they approved this research or granted a formal waiver of ethical approval
- Include an approval number if one was obtained
- If the study involved *non-human primates*, add *additional details* about animal welfare and steps taken to ameliorate suffering
- If anesthesia, euthanasia, or any kind of animal sacrifice is part of the study, include briefly which substances and/or methods were applied

**Field Research**

Include the following details if this study involves the collection of plant, animal, or other materials from a natural setting:

- Field permit number
- Name of the institution or relevant body that granted permission

**Data Availability**

Authors are required to make all data underlying the findings described fully available, without restriction, and from the time of publication. PLOS allows rare exceptions to address legal and ethical concerns. See the [PLOS Data Policy](#) and [FAQ](#) for detailed information.

Yes - all data are fully available without restriction

A Data Availability Statement describing where the data can be found is required at submission. Your answers to this question constitute the Data Availability Statement and **will be published in the article**, if accepted.

**Important:** Stating 'data available on request from the author' is not sufficient. If your data are only available upon request, select 'No' for the first question and explain your exceptional situation in the text box.

Do the authors confirm that all data underlying the findings described in their manuscript are fully available without restriction?

**Describe where the data may be found in full sentences. If you are copying our sample text, replace any instances of XXX with the appropriate details.**

- If the data are **held or will be held in a public repository**, include URLs, accession numbers or DOIs. If this information will only be available after acceptance, indicate this by ticking the box below. For example: *All XXX files are available from the XXX database (accession number(s) XXX, XXX).*
- If the data are all contained **within the manuscript and/or Supporting Information files**, enter the following:  
*All relevant data are within the manuscript and its Supporting Information files.*
- If neither of these applies but you are able to provide **details of access elsewhere**, with or without limitations, please do so. For example:

*Data cannot be shared publicly because of [XXX]. Data are available from the XXX Institutional Data Access / Ethics Committee (contact via XXX) for researchers who meet the criteria for access to confidential data.*

*The data underlying the results presented in the study are available from (include the name of the third party*

All relevant data are within the manuscript and its Supporting Information files

*and contact information or URL).*

- This text is appropriate if the data are owned by a third party and authors do not have permission to share the data.

\* typeset

Additional data availability information:



27 **Abstract**

28 **Objective:** Predominantly plant-based diets can co-benefit human physical health and the planet.  
29 Young adults appear to be on the forefront of the shift to plant-based diets. However, little is  
30 known about the relationship between plant-based diets and mental health in this population even  
31 though mental health disorders contribute substantially to the global burden of disease,  
32 particularly among this age group.

33 **Design:** In this cross-sectional study we utilize a biopsychosocial framework to assess the  
34 association between dietary intake and mental health and wellbeing. Mental health was assessed  
35 using self-reported measures of anxiety (GAD-7), depression (PHQ-9) and quality of life (single-  
36 item). Dietary intake in the prior month was assessed using a dietary screener (DSQ) and  
37 participants were asked to self-identify a diet preference (e.g., vegan).

38 **Setting and participants:** 339 university undergraduate students.

39 **Results:** A principle component analysis of dietary intake found three dominant dietary patterns  
40 (plant-based, animal-based, and 'junk foods'); 28.1% (n=95) of participants self-identified as  
41 pescatarian, vegetarian, vegan, other. The association between dietary patterns, diet preference  
42 and mental health was assessed through regression analysis. After controlling for covariables, we  
43 found a significant positive association between the junk food component and depression (z-  
44 score  $\beta=.21$ ,  $p\leq.001$ ; adj.  $R^2=.39$ ) and anxiety (z-score  $\beta=.14$ ;  $p\leq.001$ ; adj.  $R^2=.32$ ) while no  
45 association was found between plant-based, animal-based or self-identified diet preference and  
46 the mental health measures.

47 **Conclusions:** Predominantly plant-based diet patterns are not negatively associated with mental  
48 health and wellbeing. It is important to consider dietary composition and to conceptualize diet as  
49 a health behaviour that is embedded in a biopsychosocial framework.

50  
51  
52  
53  
54  
55



## 56 **1. Introduction**

57

58 Holistic health fields of enquiry such as planetary health view diet as being embedded in  
59 a complex system of interrelations between individual, social, cultural, and environmental  
60 factors. In March 2019, the EAT Lancet Commission on Healthy Diets from Sustainable Food  
61 Systems put forward the first global benchmark diet capable of sustaining human and planetary  
62 health [1]. The recommendations herein include two sets of frameworks: on the one hand, they  
63 specify food intake ensuring human health and on the other hand, they suggest specific planetary  
64 boundaries for food production. More specifically, these ‘win-win diets’ highlight the co-benefits  
65 of plant- over animal-based foods. The authors state that “when viewed together as an integrated  
66 human health and environmental sustainability agenda, ‘win-win’ diets, that fall within the safe  
67 operating space for food systems, will help to achieve global human health and environmental  
68 sustainability goals” [1].

69 The authors of this landmark report were able to draw on extensive evidence on the  
70 benefit of planetary healthy, i.e., predominantly plant-based diets, on physical health. However,  
71 the potential mental health impacts of these diets remain largely unknown. This lack of evidence  
72 is surprising given that mental and behavioural disorders are the leading cause of years lived  
73 with disability worldwide [2]. Depression and anxiety are the two leading mental health  
74 disorders in terms of global disease burden: Depressive disorders account for 40% of disability-  
75 adjusted life years (DALYs), anxiety disorders account for 15% of DALYs caused by all mental  
76 and substance use disorders [2]. Lifetime prevalence rates range from 10 to 15% for depression  
77 [3] and average 17% for all anxiety disorders combined [4]. Furthermore, mental illness often  
78 develops into a chronic, lifelong health issue that can have profound and devastating effects on

79 an individual's life trajectory by impacting and disrupting social functioning and capital [5],  
80 educational attainment [6], economic output [7], and overall quality of life (QoL) [8].

81       Approximately 75% of all mental illnesses have their onset before the age of 25 [9–11].  
82 University students in particular are vulnerable for depression, anxiety, and substance use  
83 disorders [12] and mental health issues within this population are on the rise [13,14]. This  
84 warrants interventions that support students in this developmental phase which offers potential  
85 for preventive and early intervention as it is accompanied by significant brain development with  
86 elevated neural plasticity [15,16]. To meet this growing need, research in the area of nutritional  
87 psychiatry is now considering dietary interventions to prevent and treat mental illnesses [17].  
88 These interventions have the potential to contribute to improved emotional functioning and long-  
89 term health, as the adoption of a healthy diet during this developmental period may contribute  
90 substantially to the prevention of (chronic) non-communicable diseases in later stages of life  
91 [18].

92       Young people are also particularly likely to adopt plant-based diets [19,20]. Current  
93 estimates see approximately 7% of Canada's population self-identifying as vegetarian or vegan  
94 (compared to only 2% in 2003) – with those under the age of 35 being three times more likely  
95 than older generations to identify as vegetarian or vegan while predictions see this number  
96 increasing rapidly [20]. The numbers of those who do not completely abstain from meat or other  
97 animal-based products but aim to substantially decrease their consumption, particularly of  
98 greenhouse gas and water-intense red meats and ruminant products, are even higher: According  
99 to recent consumer polls, 43% of Canadians are aiming to incorporate more plant-based foods  
100 into their diets [21] which is reflected in a constant decline of overall per capita meat  
101 consumption in Canada over the last three decades [22].

102           There are different definitions and conceptualizations of plant-based diets. One approach  
103 is to assess diet preference, i.e., someone identifies as vegetarian, vegan, or newer categories  
104 such as ‘flexitarian’, a term describing individuals who eat “primarily vegetarian with the  
105 occasional inclusion of meat or fish” [23]. Using this categorical definition of plant-based diets,  
106 preliminary findings ranged from vegetarians reporting significantly better mood and less  
107 anxiety and stress compared to non-vegetarians [24,25] to vegetarians having higher odds of  
108 lifetime prevalence of depression, anxiety, and physical disorders compared to non-vegetarians  
109 [26–30]. However, findings show that self-report of diet preference (i.e., stating whether one  
110 identifies as vegan, vegetarian, etc.) says very little about actual diet pattern and quality [31].  
111 Certain plant-based foods such as whole grains, vegetables, legumes, nuts, and fruits are indeed  
112 known to have health benefits while high intake of others such as refined grains, fried potatoes,  
113 sweets and desserts, or fruit juices are generally considered unhealthy [32]. Therefore,  
114 compositions of diet patterns and diet quality of those who describe themselves as vegetarians,  
115 vegans, pescatarians, etc. likely differ greatly between individuals and need to be assessed more  
116 carefully. Research on the association between diet and mental health utilizing composite dietary  
117 measures such as dietary patterns and diet quality indices also shows heterogenous results.  
118 However, the trend seems to point towards better mental health among those following  
119 predominantly plant-based diets, i.e., diets that are high in vegetable, fruit, whole grain intake  
120 with moderate intake of fish and worse mental health among those following a ‘Western’ diet  
121 high in animal and processed foods [33–35].

122           In this study, we conceptualized plant-based diets as diet patterns that consist mostly or  
123 exclusively of plant-based foods. We assessed diet through two approaches: using a categorical  
124 definition of plant-based diet asking respondents to self-identify according to diet preferences

125 (no preference, pescatarian, vegetarian, vegan, other with open text entry option) and the diet  
126 pattern-based approach through dietary pattern analysis. We then compared both approaches in  
127 terms of their association with depression, anxiety, and QoL hypothesizing that diet patterns high  
128 in plant foods rather than diet preference would be negatively associated with the outcomes.

129         One limitation that all previous studies on this topic have in common is their narrow  
130 focus on a primarily biomedical understanding of the relationship between diet and mental  
131 health. Neither mental health nor dietary behaviours exist in a vacuum. As described in an  
132 extensive body of research, stress, stressful life events, body image, physical activity, sleep, and  
133 social support are all predictors for mental health and wellbeing outcomes [36–41].  
134 Simultaneously, these factors are conceptually related to diet and therefore fulfill the criteria of  
135 presenting possible confounders in the relationship under investigation in this study [42–47].  
136 Previous studies have not sufficiently considered these factors, particularly the social dimension  
137 of dietary habits, in their theoretical frameworks and statistical models.

138         With this study, we therefore sought to address several gaps in the literature. We assessed  
139 diet patterns in a population of undergraduate university students. We further examined whether  
140 plant-based diet pattern and self-reported preferences are associated with mental health  
141 (depression and anxiety) and wellbeing (QoL) in this population (for simplicity, we refer to both  
142 as ‘mental health’ herein). Finally, we extend the understanding of this relationship by  
143 considering this question within a biopsychosocial rather than a currently predominant  
144 biomedical framework in this field, thereby adding important confounding variables to the  
145 analysis.

146

147

## 148 **2. Methods**

149

### 150 **2.1. Study design and participants**

151 The study design was cross-sectional. We collected data through an online self-report  
152 survey from March to April of 2019. The main outcome variables of interest were depression,  
153 anxiety, and QoL  indicator of overall mental wellbeing. The main explanatory variable was  
154 diet as assessed through dietary pattern over the prior month as well as self-reported diet  
155 preference. The survey contained additional items on social support, health behaviours and  
156 status, body image, stress, stressful life events, and socioeconomic background.

157 We recruited participants among undergraduate students at the University of British  
158 Columbia (UBC), Vancouver, Canada through convenience sampling; data was collected  
159 anonymously. Excluding graduate students (n=9) and cases that were missing items for any of  
160 the main outcome or main explanatory variables (n=92) yielded a final analytic sample of n=339  
161 respondents.

162

### 163 **2.2. Measures**

164 To assess dietary habits, we used the U.S. National Cancer Institute's Dietary Screening  
165 Questionnaire (DSQ) which asks about the frequency of consumption of select foods and  
166 beverages in the past 30 days. Evaluations have shown good agreement between estimates of  
167 intakes between the DSQ and multiple 24hr recalls with differences in means <2% and  
168 differences in prevalence <16% [48]. In its original version, the DSQ includes 26 items. The  
169 questionnaire was slightly altered in order to make it more appropriate for the local context and  
170 to include items that were relevant to this study such as consumption of poultry, additional dairy

171 products, vegetarian meat alternatives, and non-dairy milk. The final version used in this study  
172 had 28 items (see supplementary materials for questionnaire).

173 In addition to the DSQ, we included one item asking about dietary preference.  
174 Participants were asked if they identified as: a) pescatarian ('you eat fish, eggs, and dairy but no  
175 meat or poultry'); b) vegetarian ('you eat eggs and dairy but no fish, meat or poultry'); c) vegan  
176 ('you don't eat any animal products'); d) other ('please specify'; participants were given the  
177 option to enter text); e) none of the above.

178 We assessed QoL as a measure for overall mental wellbeing through a single-item  
179 measure ("In general, would you say your quality of life is...") with responses rated on a 5-point  
180 Likert scale (0=poor, 1=fair, 2=good, 3=very good, 4=excellent). This single-item measure is  
181 one of the most widely used items to measure QoL and has been included in routinely used  
182 assessment tools such as the Patient-Reported Outcomes Measurement Information System Scale  
183 version 1.2 PROMIS<sup>®</sup> [49].

184 We assessed depressive symptoms using the 9-item Patient Health Questionnaire (PHQ-  
185 9) which is widely used in both clinical and research settings and has been validated for a variety  
186 of populations to detect and assess severity of depressive symptoms [50–53]. The total score  
187 ranges from 0 to 27. PHQ-9 scores of  $\geq 10$  have been reported to have a sensitivity of 88% and a  
188 specificity of 88% for major depression [53]. For clinical and diagnostic purposes, the measure  
189 can further be used to assess severity of symptoms applying cut-off scores. Cut-off scores for  
190 mild, moderate, moderately severe, and severe depression were found to be 5, 10, 15, and 20,  
191 respectively [53]. In general, a score  $\geq 10$  means that further clinical evaluation is indicated while  
192 a score  $\geq 20$  indicates that the individual may require psychotherapy and/or medication.

193 We assessed anxiety symptoms using the 7-item General Anxiety Disorder Questionnaire  
194 (GAD-7). Similar to the PHQ-9, this is a standard instrument to detect and assess the severity of  
195 anxiety disorder used widely for both clinical and research practices. Although originally  
196 designed to detect general anxiety disorder, it has been found that the GAD-7 is useful as a  
197 screening instrument for related anxiety disorders such as post-traumatic stress disorder, social  
198 anxiety disorder, and panic disorder [54]. The total score ranges from 0 to 21; for GAD-7 scores  
199  $\geq 10$ , sensitivity and specificity have been reported to be above 80% [55]. Much like the PHQ-9,  
200 the GAD-7 can further be used to assess severity of symptoms by applying cut-off scores. Cut-  
201 off scores for mild, moderate, and severe anxiety were found to be 5, 10, and 15, respectively  
202 [55]. In general, a score  $\geq 10$  means that further clinical evaluation is indicated while a score  $\geq 15$   
203 indicates that the individual may require psychotherapy and/or medication.

204

### 205 **2.3. Statistical analyses and missing data**

206 For descriptive purposes, we reported continuous variables through the mean and  
207 standard deviation (SD); for categorical variables, we reported frequencies.

208 The final sample consisted of  $n=339$  participants. In this analytic sample, the data on the  
209 main variables of interest (QoL, depression, anxiety, DSQ) was complete for all respondents.  
210 For covariables, responses such as ‘prefer not to say’ and ‘don’t know’ were treated as missing  
211 data. We applied multiple imputation (Markov Chain Monte Carlo Method; five imputations) to  
212 address missing data for all covariables that were to be included in the multiple regression model  
213 based on the conceptual understanding of the relationship between diet and mental health in  
214 order to avoid underestimation of sampling error [56].

215 We applied principal component analysis (PCA) with varimax rotation as a data  
216 reduction approach for the evaluation of the DSQ items. The decision on how many components  
217 were to be retained was based on considering the combination of interpretability and conceptual  
218 reasoning of the emerging components, the eigenvalues ( $>1$ ), the scree plot, and the percentage  
219 of variance explained by the components. Varimax rotation was chosen as it was assumed that  
220 emerging components would not be highly correlated with each other.

221 The PCA component scores for each participant were entered into regression models as  
222 the main explanatory variable when examining the relationship between diet pattern and mental  
223 health outcomes (using the total scores of the PHQ-9 and GAD-7 measures). We built three  
224 nested linear regression models per outcome using a hierarchical approach. We first entered  
225 sociodemographic factors (age, gender, ethnicity), then added lifestyle-related variables (physical  
226 activity, sleep, weight satisfaction, stress, stressful life events). The third step was to add social  
227 support as a known individual predictor for mental health. Finally, we added the main variables  
228 of interest (PCA component scores) to assess its additional contribution to the outcome of  
229 interest. These nested models were built for each outcome variable of interest: Model 1: QoL;  
230 Model 2: Depression; Model 3: Anxiety. This approach was repeated with self-reported diet  
231 preference as the main explanatory variable. Assumptions for linear models were met. All  
232 analyses were 2-tailed with a significance level of  $p \leq 0.05$  and conducted with IBM SPSS  
233 Statistics 25<sup>®</sup>.

234  
235  
236  
237  
238  
239



## 240 **3. Results**

241

### 242 **3.1. Sample characteristics and covariates**

243 The total sample consists of n=339 participants  **Table 1** depicts detailed sample  
244 characteristics as well as frequencies of covariables that were included in the regression models  
245 such as health behaviours (physical activity and sleep), body image, overall stress, stressful life  
246 events, and social support. Overall, we found that almost none of the students (96.1%, n=326)  
247 met the recommended amount of moderate or vigorous physical activity in the previous week.  
248 Three quarters of the participants (76.7%, n=260) reported enough sleep to feel rested on a  
249 maximum of four days in the previous week. Two thirds of the students (66.6%, n=226)  
250 experienced more than average or even tremendous stress over the 12 months preceding the  
251 survey. Approximately half of the students were somewhat, very, or extremely satisfied with  
252 their weight (52.6%, n=178). Experiencing stressful life events that caused moderate or severe  
253 stress was reported by 76.3% (n=259) of the students. Conversely, the majority of participants  
254 (80.4%, n=272) reported having good, very good, or excellent satisfaction with their social  
255 relationships and activities.

256 **Table 1** Participant demographic and psychosocial characteristics

| Characteristic/Item                                                                                           | Item categories             | mean | SD  | n <sup>†</sup> | %                                                                                          |
|---------------------------------------------------------------------------------------------------------------|-----------------------------|------|-----|----------------|--------------------------------------------------------------------------------------------|
| <i>Age</i>                                                                                                    |                             | 19.5 | 1.9 |                |                                                                                            |
| <i>Gender identity</i>                                                                                        | Female                      |      |     | 224            | 66.1                                                                                       |
|                                                                                                               | Male                        |      |     | 109            | 32.1                                                                                       |
|                                                                                                               | Other (trans, queer, other) |      |     | 6              | 1.8                                                                                        |
| <i>Sexual orientation</i>  | Heterosexual                |      |     | 257            | 75.8                                                                                       |
|                                                                                                               | Bisexual                    |      |     | 33             | 9.7                                                                                        |
|                                                                                                               | Gay/Lesbian                 |      |     | 6              | 1.8                                                                                        |
|                                                                                                               | Other                       |      |     | 28             | 8.3                                                                                        |
| <i>Relationship status</i>                                                                                    | Not in a relationship       |      |     | 221            | 65.2  |
|                                                                                                               | In a relationship           |      |     | 95             | 28.0                                                                                       |
|                                                                                                               | Not sure                    |      |     | 12             | 3.5                                                                                        |

| <b>Characteristic/Item</b>                                                                                    | <b>Item categories</b>                     | <b>mean</b> | <b>SD</b> | <b>n<sup>†</sup></b> | <b>%</b> |
|---------------------------------------------------------------------------------------------------------------|--------------------------------------------|-------------|-----------|----------------------|----------|
| <b><i>Ethnicity</i></b>                                                                                       | White                                      |             |           | 156                  | 46.0     |
|                                                                                                               | Asian                                      |             |           | 135                  | 39.8     |
|                                                                                                               | Other                                      |             |           | 48                   | 14.2     |
| <b><i>Year in school</i></b>                                                                                  | 1 <sup>st</sup> year                       |             |           | 211                  | 62.2     |
|                                                                                                               | 2 <sup>nd</sup> year                       |             |           | 64                   | 18.9     |
|                                                                                                               | 3 <sup>rd</sup> year                       |             |           | 28                   | 8.3      |
|                                                                                                               | 4 <sup>th</sup> year                       |             |           | 19                   | 5.6      |
|                                                                                                               | Higher than 4 <sup>th</sup> year undergrad |             |           | 9                    | 2.7      |
|                                                                                                               | Not seeking a degree                       |             |           | 1                    | 0.3      |
| <b><i>International student</i></b>                                                                           | Yes                                        |             |           | 120                  | 35.4     |
|                                                                                                               | No                                         |             |           | 213                  | 62.8     |
| <b><i>Residence</i></b>                                                                                       | On-campus                                  |             |           | 248                  | 73.2     |
|                                                                                                               | With parents                               |             |           | 34                   | 10.0     |
|                                                                                                               | Off-campus alone/with roommates/other      |             |           | 48                   | 14.2     |
| <b><i>Physical activity in the past 7 days (20min of vigorous exercise or 30min of moderate exercise)</i></b> | Never                                      |             |           | 94                   | 27.6     |
|                                                                                                               | 1-3 days/week                              |             |           | 167                  | 49.3     |
|                                                                                                               | 4-6 days/week                              |             |           | 65                   | 19.1     |
|                                                                                                               | every day or more than once a day          |             |           | 13                   | 3.9      |
| <b><i>Enough sleep to feel rested in the morning in the past 7 days</i></b>                                   | ≤ 4 days/week                              |             |           | 260                  | 76.7     |
|                                                                                                               | ≥ 5 days/week                              |             |           | 79                   | 23.1     |
| <b><i>Weight satisfaction</i></b>                                                                             | not satisfied/slightly unsatisfied         |             |           | 161                  | 47.4     |
|                                                                                                               | somewhat satisfied                         |             |           | 101                  | 29.9     |
|                                                                                                               | very/extremely satisfied                   |             |           | 77                   | 22.7     |
| <b><i>Perceived stress</i></b>                                                                                | no/less than average stress                |             |           | 25                   | 7.4      |
|                                                                                                               | average stress                             |             |           | 88                   | 26.0     |
|                                                                                                               | more than average/tremendous stress        |             |           | 226                  | 66.6     |
| <b><i>Stressful life events</i></b>                                                                           | mild stressors                             |             |           | 81                   | 23.8     |
|                                                                                                               | moderate stressors                         |             |           | 149                  | 44.1     |
|                                                                                                               | severe stressors                           |             |           | 109                  | 32.2     |
| <b><i>Social support</i></b>                                                                                  | poor/fair                                  |             |           | 67                   | 19.6     |
|                                                                                                               | good/very good/excellent                   |             |           | 272                  | 80.4     |

257 <sup>†</sup>n may vary due to missing data

### 258 **3.2. Diet**

259 Three dietary components emerged from the PCA of the DSQ items. Component 1 (plant  
260 foods) was high in plant-based foods and non-animal-based dairy and meat alternatives as well

261 as whole grains. Component 2 (animal foods) was high in animal-based foods such as different  
 262 meats and dairy products. Component 3 (junk foods) was high in processed foods, snacks, and  
 263 candies. The total variance explained by the retained three components was 40.6%. Details on  
 264 loadings per component for each food item/group after varimax rotation can be seen in **Table 2**.  
 265 For better interpretability, we removed food items/groups that did not load  $\geq 0.4$  on either of the  
 266 components (namely, potatoes, tomato sauce, and fruit juice) from the final analysis [57]. In  
 267 addition, loadings below 0.4 are omitted from the table to improve readability.

268 **Table 2** Principal component analysis of dietary components and component loadings for dietary  
 269 patterns after varimax rotation

| Food item/group                           | Component 1<br>(plant foods) | Component 2<br>(animal foods) | Component 3<br>(junk foods) |
|-------------------------------------------|------------------------------|-------------------------------|-----------------------------|
| <i>Brown rice and whole grains</i>        | 0.70                         |                               |                             |
| <i>Beans and legumes</i>                  | 0.68                         |                               |                             |
| <i>Nuts and seeds</i>                     | 0.66                         |                               |                             |
| <i>Green leafy vegetables</i>             | 0.66                         |                               |                             |
| <i>Other vegetables</i>                   | 0.64                         |                               |                             |
| <i>Fruit</i>                              | 0.63                         |                               |                             |
| <i>Vegetarian/vegan meat alternatives</i> | 0.53                         | -0.46                         |                             |
| <i>Non-dairy milk</i>                     | 0.51                         | -0.41                         |                             |
| <i>Whole grain bread</i>                  | 0.49                         |                               |                             |
| <i>Cereal</i>                             | 0.43                         |                               |                             |
| <i>Poultry</i>                            |                              | 0.80                          |                             |
| <i>Red meat</i>                           |                              | 0.75                          |                             |
| <i>Processed meat</i>                     |                              | 0.68                          |                             |
| <i>Fish and seafood</i>                   |                              | 0.61                          |                             |
| <i>Cheese</i>                             |                              | 0.56                          |                             |
| <i>Yoghurt</i>                            |                              | 0.50                          |                             |
| <i>Dairy milk</i>                         |                              | 0.49                          |                             |
| <i>Cookies, cake, pie</i>                 |                              |                               | 0.65                        |
| <i>Ice cream</i>                          |                              |                               | 0.61                        |
| <i>Donuts etc.<sup>†</sup></i>            |                              |                               | 0.60                        |
| <i>Chocolate and candy</i>                |                              |                               | 0.60                        |
| <i>Soda</i>                               |                              |                               | 0.54                        |
| <i>Pizza</i>                              |                              |                               | 0.51                        |
| <i>Fried potatoes</i>                     |                              |                               | 0.50                        |
| <i>Coffee or tea with sugar</i>           |                              |                               | 0.41                        |

270 <sup>†</sup>this item on the questionnaire included donuts, sweet rolls, Danish, muffins, pan dulce, and pop-tarts

271 Almost one third of students (28.1%, n= 95) self-identified as either pescatarian,  
272 vegetarian, vegan or other (which were mostly on a spectrum of non-mainstream preferences  
273 such as reducetarian or flexitarian). See **Table 3** for details.

274 **Table 3** Diet preference

| Diet preference                            | n   | %    |
|--------------------------------------------|-----|------|
| <i>Pescatarian</i>                         | 13  | 4.0  |
| <i>Vegetarian</i>                          | 19  | 5.5  |
| <i>Vegan</i>                               | 37  | 10.8 |
| <i>Other</i>                               | 26  | 7.8  |
| <i>Do not identify as any of the above</i> | 244 | 71.9 |

275

### 276 **3.3. Mental health and wellbeing**

277 As can be seen in **Table 4**, more than half of the participants (56.3%, n=193) reported  
278 their overall QoL to be either very good or excellent with a mean score of 2.6 ( $\pm$ 1.0) out of 5.  
279 The mean score for depression was 9.3 ( $\pm$ 6.1) out of 27; the mean score for anxiety was 7.9  
280 ( $\pm$ 5.8) out of 21. In terms of clinical relevance, 75% (n=254) of students had scores which  
281 indicate the need for further evaluation concerning symptoms of depression; for anxiety 65.1%  
282 (n=221) had scores indicating need for further evaluation. Of those who scored above 10 points  
283 for depression (n=142), 16% (n=23) would likely benefit from psychotherapy and/or medication;  
284 for those who scored above 10 points for anxiety (n=110) this proportion is even higher with  
285 48% (n=53).

286

287

288

289

290

291 **Table 4** Mental health and wellbeing

| Mental health item                | Item categories                | mean | SD  | n   | %    |
|-----------------------------------|--------------------------------|------|-----|-----|------|
| <i>QoL continuous (0 to 5)</i>    |                                | 2.6  | 1.0 |     |      |
| <i>QoL ordinal</i>                | Poor                           |      |     | 10  | 2.8  |
|                                   | Fair                           |      |     | 31  | 9.2  |
|                                   | Good                           |      |     | 105 | 31.1 |
|                                   | very good                      |      |     | 138 | 40.1 |
|                                   | Excellent                      |      |     | 55  | 16.2 |
| <i>Depression score (0 to 27)</i> |                                | 9.3  | 6.1 |     |      |
| <i>Depression severity</i>        | no depression                  |      |     | 85  | 25.0 |
|                                   | mild depression <sup>†</sup>   |      |     | 112 | 32.9 |
|                                   | moderate depression            |      |     | 73  | 21.7 |
|                                   | moderately severe depression   |      |     | 46  | 13.6 |
|                                   | severe depression <sup>‡</sup> |      |     | 23  | 6.8  |
| <i>Anxiety score (0 to 21)</i>    |                                | 7.9  | 5.8 |     |      |
| <i>Anxiety severity</i>           | no anxiety                     |      |     | 118 | 34.8 |
|                                   | mild anxiety                   |      |     | 111 | 32.7 |
|                                   | moderate anxiety               |      |     | 57  | 16.8 |
|                                   | severe anxiety <sup>‡</sup>    |      |     | 53  | 15.6 |

292 Abbreviation: QoL, quality of life

293 <sup>†</sup>Cut-off for further evaluation

294 <sup>‡</sup>Psychotherapy and/or medication are indicated

295

### 296 **3.4. Association between diet and mental health and wellbeing**

297 The unadjusted linear regression analysis shows a significant association between several  
 298 variables. The plant food dietary component was positively associated with QoL ( $\beta=.20, p\leq.001$ ).  
 299 The junk food component was positively associated with depression ( $\beta=.26, p\leq.001$ ), while the  
 300 animal food component and the plant food component were negatively associated with  
 301 depression ( $\beta=-.07, p\leq.05$  and  $\beta=-.10, p\leq.001$ , respectively). The junk food component was  
 302 further positively associated with anxiety ( $\beta=.18, p=.001$ ) and the animal food component was  
 303 negatively associated with anxiety ( $\beta=-.09, p\leq.001$ ). After adjusting for all covariables, the  
 304 positive associations between the junk food component and depression and anxiety remain  
 305 significant.

306 Model 1 (dietary pattern and QoL): After adjusting for all covariables, statistically  
307 significant negative associations were found between Asian ethnicity, stress, and QoL;  
308 significant positive associations were found for physical activity, weight satisfaction, and social  
309 support with QoL. Social support showed the strongest positive association for QoL ( $\beta=.51$   
310 increase in QoL score;  $p\leq.001$ ).

311 Model 2 (dietary pattern and depression): After adjusting for all covariables, statistically  
312 significant negative associations were found between sleep, weight satisfaction, and social  
313 support with depression; a statistically significant positive association was found for stress and  
314 the junk food dietary component ( $\beta=.21$  increase in depression score;  $p\leq.001$ ;  $\Delta\text{adj. } R^2=.04$ ).

315 Model 3 (dietary pattern and anxiety): After adjusting for all covariables, statistically  
316 significant positive associations were found between female gender, stress, stressful life events,  
317 and the junk food dietary component ( $\beta=.14$  increase in anxiety score;  $p=.002$ ;  $\Delta\text{adj. } R^2=.01$ )  
318 with anxiety. Social support was significantly negatively associated with anxiety.

319 **Table 5** shows the detailed results for the three hierarchical multiple linear regression  
320 models that examined the association between dietary patterns and mental wellbeing outcomes  
321 controlling for covariables that reflected a biopsychosocial understanding of the relationship.  
322  $\Delta\text{adj. } R^2$  for each hierarchical step are reported in the footnotes.

323 Diet preference was not significantly associated with any of the outcome variables.  
324 Results are available upon request for these statistically non-significant findings.

325 **Table 5** Unadjusted and adjusted effects of principal component analysis (PCA) diet components on quality of life (QoL), depression,  
 326 and anxiety

|                              | Model 1: QoL |         |                               | Model 2: Depression |         |                               | Model 3: Anxiety |         |                               |
|------------------------------|--------------|---------|-------------------------------|---------------------|---------|-------------------------------|------------------|---------|-------------------------------|
|                              | Beta         | SE Beta | Standardized Beta ( $\beta$ ) | Beta                | SE Beta | Standardized Beta ( $\beta$ ) | Beta             | SE Beta | Standardized Beta ( $\beta$ ) |
| <i>Step 1</i>                |              |         |                               |                     |         |                               |                  |         |                               |
| Constant                     | 3.72         | 0.52    | 0.08                          | 3.58                | 3.36    | -0.10                         | 3.31             | 3.15    | -0.25                         |
| Age                          | -0.05        | 0.03    | <b>-0.11*</b>                 | 0.26                | 0.17    | 0.09                          | 0.16             | 0.16    | 0.05                          |
| Female gender <sup>†</sup>   | 0.20         | 0.12    | 0.21                          | -0.10               | 0.71    | -0.02                         | 1.31             | 0.67    | <b>0.23*</b>                  |
| Other gender <sup>†</sup>    | -0.52        | 0.42    | -0.55                         | 4.57                | 2.80    | 0.75                          | 4.68             | 2.62    | 0.81                          |
| Asian ethnicity <sup>‡</sup> | -0.50        | 0.11    | <b>-0.52**</b>                | 1.34                | 0.72    | 0.22                          | 0.79             | 0.68    | 0.14                          |
| Other ethnicity <sup>‡</sup> | -0.02        | 0.16    | -0.02                         | 0.73                | 1.02    | 0.12                          | 1.40             | 0.96    | 0.24                          |
| <i>Step 2</i>                |              |         |                               |                     |         |                               |                  |         |                               |
| Constant                     | 3.55         | 0.54    | -0.03                         | 5.62                | 3.13    | 0.05                          | 0.85             | 3.00    | -0.12                         |
| Age                          | -0.03        | 0.03    | -0.07                         | 0.08                | 0.14    | 0.03                          | 0.02             | 0.14    | 0.01                          |
| Female gender <sup>†</sup>   | 0.26         | 0.10    | <b>0.27*</b>                  | -0.84               | 0.60    | -0.14                         | 0.63             | 0.58    | 0.11                          |
| Other gender <sup>†</sup>    | -0.11        | 0.40    | -0.11                         | 1.10                | 2.36    | 0.18                          | 1.49             | 2.26    | 0.26                          |
| Asian ethnicity <sup>‡</sup> | -0.40        | 0.10    | <b>-0.41**</b>                | 0.56                | 0.62    | 0.09                          | 0.35             | 0.60    | 0.06                          |
| Other ethnicity <sup>‡</sup> | 0.07         | 0.14    | 0.07                          | 0.04                | 0.86    | 0.01                          | 0.76             | 0.82    | 0.13                          |
| Sleep                        | 0.04         | 0.02    | 0.09                          | -0.58               | 0.15    | <b>-0.20**</b>                | -0.32            | 0.14    | <b>-0.12*</b>                 |
| Physical activity            | 0.07         | 0.02    | <b>0.14*</b>                  | -0.36               | 0.15    | <b>-0.12*</b>                 | -0.19            | 0.14    | -0.07                         |
| Stress                       | -0.30        | 0.06    | <b>-0.27**</b>                | 2.16                | 0.34    | <b>0.31**</b>                 | 2.55             | 0.33    | <b>0.39**</b>                 |
| Stressful life events        | 0.02         | 0.07    | 0.02                          | 0.72                | 0.40    | 0.09                          | 1.02             | 0.39    | <b>0.13*</b>                  |
| Weight satisfaction          | 0.11         | 0.04    | <b>0.12*</b>                  | -1.15               | 0.27    | <b>-0.20**</b>                | -0.54            | 0.26    | <b>-0.10*</b>                 |
| <i>Step 3</i>                |              |         |                               |                     |         |                               |                  |         |                               |
| Constant                     | 1.74         | 0.48    | 0.06                          | 10.54               | 3.24    | 0.01                          | 4.43             | 3.13    | -0.15                         |
| Age                          | -0.01        | 0.02    | -0.01                         | -0.01               | 0.14    | -0.01                         | -0.04            | 0.14    | -0.02                         |
| Female gender <sup>†</sup>   | 0.06         | 0.09    | 0.06                          | -0.30               | 0.60    | -0.05                         | 1.02             | 0.58    | 0.18                          |
| Other gender <sup>†</sup>    | -0.22        | 0.33    | -0.23                         | 1.40                | 2.30    | 0.23                          | 1.70             | 2.23    | 0.30                          |
| Asian ethnicity <sup>‡</sup> | -0.28        | 0.09    | <b>-0.30*</b>                 | 0.26                | 0.60    | 0.04                          | 0.13             | 0.59    | 0.02                          |
| Other ethnicity <sup>‡</sup> | 0.11         | 0.12    | 0.11                          | -0.06               | 0.83    | -0.01                         | 0.69             | 0.81    | 0.12                          |
| Sleep                        | 0.01         | 0.02    | 0.03                          | -0.50               | 0.14    | <b>-0.17**</b>                | -0.19            | 0.14    | -0.09                         |
| Physical activity            | 0.06         | 0.02    | <b>0.13*</b>                  | -0.35               | 0.14    | <b>-0.11*</b>                 | -0.19            | 0.14    | -0.07                         |
| Stress                       | -0.17        | 0.05    | <b>-0.16**</b>                | 1.84                | 0.34    | <b>0.27**</b>                 | 2.31             | 0.33    | <b>0.36**</b>                 |
| Stressful life events        | 0.05         | 0.06    | 0.04                          | 0.65                | 0.39    | 0.08                          | 0.96             | 0.38    | <b>0.13*</b>                  |
| Weight satisfaction          | 0.09         | 0.04    | <b>0.10*</b>                  | -1.10               | 0.26    | <b>-0.19**</b>                | -0.50            | 0.26    | <b>-0.10*</b>                 |

|                                    | Model 1: QoL |         |                               | Model 2: Depression |         |                               | Model 3: Anxiety |         |                               |
|------------------------------------|--------------|---------|-------------------------------|---------------------|---------|-------------------------------|------------------|---------|-------------------------------|
|                                    | Beta         | SE Beta | Standardized Beta ( $\beta$ ) | Beta                | SE Beta | Standardized Beta ( $\beta$ ) | Beta             | SE Beta | Standardized Beta ( $\beta$ ) |
| <b>Social support</b>              | 0.46         | 0.04    | <b>0.51**</b>                 | -1.26               | 0.28    | <b>-0.22**</b>                | -0.92            | 0.27    | <b>-0.17**</b>                |
| <i>Step 4</i>                      |              |         |                               |                     |         |                               |                  |         |                               |
| <b>Constant</b>                    | 1.77         | 0.49    | 0.07                          | 10.30               | 3.22    | -0.02                         | 4.20             | 3.15    | -0.17                         |
| <b>Age</b>                         | -0.01        | 0.02    | -0.01                         | 0.01                | 0.14    | 0.01                          | -0.04            | 0.14    | -0.01                         |
| <b>Female gender<sup>†</sup></b>   | 0.04         | 0.10    | 0.04                          | -0.02               | 0.63    | -0.01                         | 1.28             | 0.62    | <b>0.22*</b>                  |
| <b>Other gender<sup>†</sup></b>    | -0.23        | 0.34    | -0.24                         | 1.41                | 2.26    | 0.23                          | 1.73             | 2.22    | 0.30                          |
| <b>Asian ethnicity<sup>‡</sup></b> | -0.28        | 0.09    | <b>-0.29*</b>                 | 0.23                | 0.60    | 0.04                          | 0.08             | 0.60    | 0.01                          |
| <b>Other ethnicity<sup>‡</sup></b> | 0.11         | 0.12    | 0.12                          | 0.02                | 0.82    | 0.01                          | 0.72             | 0.80    | 0.12                          |
| <b>Sleep</b>                       | 0.01         | 0.02    | 0.02                          | -0.49               | 0.14    | <b>-0.17**</b>                | -0.25            | 0.14    | -0.09                         |
| <b>Physical activity</b>           | 0.06         | 0.02    | <b>0.12*</b>                  | -0.25               | 0.15    | -0.08                         | -0.10            | 0.15    | -0.04                         |
| <b>Stress</b>                      | -0.17        | 0.05    | <b>-0.16**</b>                | 1.82                | 0.33    | <b>0.27**</b>                 | 2.30             | 0.33    | <b>0.36**</b>                 |
| <b>Stressful life events</b>       | 0.05         | 0.06    | 0.04                          | 0.42                | 0.38    | 0.05                          | 0.81             | 0.39    | <b>0.11*</b>                  |
| <b>Weight satisfaction</b>         | 0.09         | 0.04    | <b>0.10*</b>                  | -0.96               | 0.26    | <b>-0.17**</b>                | -0.42            | 0.25    | -0.08                         |
| <b>Social support</b>              | 0.46         | 0.04    | <b>0.51**</b>                 | -1.36               | 0.28    | <b>-0.23**</b>                | -0.97            | 0.27    | <b>-0.18**</b>                |
| <b>PCA plant foods</b>             | 0.04         | 0.04    | 0.05                          | -0.07               | 0.30    | -0.01                         | -0.19            | 0.29    | -0.03                         |
| <b>PCA animal foods</b>            | 0.01         | 0.04    | 0.01                          | -0.15               | 0.28    | -0.02                         | -0.14            | 0.28    | -0.02                         |
| <b>PCA junk foods</b>              | -0.01        | 0.04    | -0.01                         | 1.26                | 0.27    | <b>0.21**</b>                 | 0.83             | 0.27    | <b>0.14*</b>                  |

327 <sup>†</sup>Reference category: Male gender

328 <sup>‡</sup>Reference category: Caucasian ethnicity

329 \* $p \leq 0.05$

330 \*\* $p \leq 0.001$ .

331 Note Model 1: Adjusted  $R^2 = .08$  for Step 1;  $\Delta$  adj  $R^2 = .13$  for Step 2;  $\Delta$  adj  $R^2 = .23$  for Step 3;  $\Delta$  adj  $R^2 = .00$  for Step 4

332 Note Model 2: Adjusted  $R^2 = .01$  for Step 1;  $\Delta$  adj  $R^2 = .30$  for Step 2;  $\Delta$  adj  $R^2 = .04$  for Step 3;  $\Delta$  adj  $R^2 = .04$  for Step 4

333 Note Model 3: Adjusted  $R^2 = .02$  for Step 1;  $\Delta$  adj  $R^2 = .27$  for Step 2;  $\Delta$  adj  $R^2 = .02$  for Step 3;  $\Delta$  adj  $R^2 = .01$  for Step 4



## 334 **4. Discussion**

335

### 336 **4.1. Interpretation**

337         The final adjusted regression models show that the junk food component score was  
338 positively associated with depression and anxiety while there were no significant associations  
339 between the plant food or the animal food component and any of the mental health outcomes.  
340 While the additional variance explained by the dietary component (junk food) with regard to the  
341 mental health outcomes seems small ( $\Delta$  adjusted  $R^2$  for the model with depression as outcome =  
342 .04 and = .01 for the model with anxiety as outcome, respectively), the magnitude of the  
343 standardized regression coefficient is comparable to other covariates in the model that are known  
344 to be strongly associated with mental health outcomes (e.g., social support). There are two  
345 possible explanations for this. In line with the understanding that mental health and diet exist  
346 within a biopsychosocial framework, food intake contributes to a complex network of variables  
347 that reduce or enhance the risk for adverse mental health outcomes such as social support and  
348 relationships. Second, it has been found that self-reported dietary data typically leads to an  
349 underestimation of associations [58]. The possibility of underestimation of the association is  
350 therefore likely in this study which would mean that the true effect size may be larger. The non-  
351 significant trend in the expected direction for the association of the plant food component with  
352 mental health outcomes after adjusting for the covariables in this study should thus be interpreted  
353 as inconclusive and needs further exploration.

354         By adjusting for important confounders which have not previously been included in  
355 studies of mental health and diet, this present study corroborates the finding that ‘unhealthy’  
356 dietary patterns are associated with depression and anxiety [34,59,60]. One possible causal

357 pathway through which unhealthy foods such as processed (i.e., “foods that are altered to add or  
358 introduce substances that substantially change their nature or use”) and ultra-processed foods  
359 (i.e., “industrial formulations, usually made mainly or solely from industrial ingredients, which  
360 contain little or no whole food”) [61] may negatively impact mental health is that of  
361 inflammatory reactions and oxidative stress [62,63]. Interestingly, in this study, processed plant-  
362 based foods such as meat replacements did not load strongly on the junk food component but  
363 actually showed high component loadings in the plant food component. However, future research  
364 is needed to understand whether these foods reflect healthier dietary patterns, particularly given  
365 the rise of consumer demand for plant-based processed foods. For example, the development and  
366 application of a dietary screening measure that captures these foods in more detail may render a  
367 better understanding of these emerging dietary patterns.

368         The prevalence of clinically-relevant levels of depression and anxiety is high in this  
369 sample of 339 undergraduate students. These prevalence rates are in line with findings from  
370 previous research on the mental health of students indicating that the prevalence of mental health  
371 issues is higher among university students than in the general population [12,64]. There are  
372 several hypotheses why this may be the case. The typical age-of-onset of many psychiatric  
373 disorders overlaps with entry into university [11]; and the transition into university presents a  
374 stressful life event which is accompanied by homesickness, potentially social isolation, financial  
375 burden and pressure, and stress – all of which are risk factors for the development of depression  
376 and anxiety [65].

377         Conversely, more than half of the participants also report their overall QoL to be either  
378 very good or excellent. While this may at first seem counterintuitive, this is actually in line with  
379 the concept of QoL being a measure of a full continuum of (mental) wellbeing wherein the

380 presence of symptoms of a disorder such as depression and anxiety merely present one  
381 dimension. It has been found, for example, that factors such as self-esteem or social support  
382 mitigate the role of depressive symptoms on QoL [66]. Fahy et al. also found that the strongest  
383 predictors for QoL in people with severe mental illness were unmet basic, social, and functional  
384 needs (in combination with symptom severity)[67]. Thus, assessing QoL in addition to screening  
385 for depression and anxiety provides a more complete picture of mental wellbeing and its  
386 associated factors in this study.

387         The possibility of reverse causality is another important consideration that researchers  
388 have identified [30] with one prospective cohort study providing probable evidence for reverse  
389 causality between depression and a healthy diet pattern [68]. Because dietary changes are  
390 perceived as a means to shape health, it can be hypothesized that a change in dietary behaviour  
391 could follow the onset of mental health issues as a form of ‘self-medication’. Conversely, the  
392 ‘self-medication’ may also take on the form of an unhealthy diet consistent of foods high in  
393 sugar and fat to feel instant gratification [69].

394

#### 395 **4.2. Strengths and limitations**

396         This study utilizes a biopsychosocial conceptual understanding of the relationship  
397 between exposure and outcome and the inclusion of confounding variables that goes beyond a  
398 narrow biomedical approach. The present study builds on previous studies on this topic.  
399 Nevertheless, in order to eliminate temporal ambiguity, confounding, and response biases, more  
400 sophisticated study designs are needed in future investigations.

401         The relatively small sample size and the associated lack of power means that some effects  
402 of the explanatory variables may have remained uncovered in this study and that an

403 underestimation for these effects was likely present. This may have been amplified by the  
404 finding that self-reported data on diet typically leads to an underestimation of associations [58].

405         In this present study, all participants were undergraduate students. The external validity  
406 of this study beyond the student population is thus limited as university students differ from their  
407 non-student peers and the general population in several characteristics, e.g., in terms of  
408 socioeconomic backgrounds, lifestyle behaviours, or substance use [70,71]. In relation to the  
409 general population of undergraduates at the university, this sample was, however, fairly  
410 representative as its sociodemographic composition was comparable with that of the overall  
411 undergraduate student population. It is also important to note that across the continuum of  
412 depressive and anxiety symptoms, eating behaviours may differ (e.g., individuals with major  
413 depressive disorder often suffer from very reduced appetite and their overall food intake may be  
414 severely decreased). Thus, the findings of this study may not apply to individuals suffering from  
415 major depressive and anxiety disorders as this study was not conducted on a clinical sample.

416         All collected information was exclusively self-reported which introduces non-response,  
417 reporting, and recall biases. In this study, the primary interest was to assess diet patterns rather  
418 than exact nutrient intake. Self-reported diet data have been deemed adequate and superior to  
419 non-self-reported measures such as biomarkers especially when analyzing diet patterns as they  
420 provide more complete information on the composition of the overall diet [58]. Given that  
421 dietary screeners are less burdensome on participants than methods like repeated 24-hr recalls  
422 while still providing sufficient information on food intake, we chose to use the DSQ as measure  
423 for diet [48]. Its limitations include that it does not allow for conclusions about the actual amount  
424 of food intake nor does it capture the full range of foods in one's diet. To mitigate the  
425 subjectivity and biased information from self-reported mental health issues, this study included

426 validated screening instruments (one-item QoL scale, PHQ-9, GAD-7). While answers are still  
427 self-reported, these measures have been extensively validated.

428         It is also important to note that the different measures in this study assessed variables  
429 with different time frames. More specifically, the DSQ asked about food intake within the past  
430 30 months whereas the PHQ-9 and GAD-7 assessed symptoms in the past two weeks. Other  
431 items evaluating covariables did not consider a specific time frame. Hence, based on the time-  
432 frames of the measures and the cross-sectional study design, inferences can only be made about  
433 the prevalence of the exposures and the outcomes and their degree of association at one point in  
434 time.

435

#### 436 **4.3. Conclusions and future directions**

437         We show that plant foods are positively associated with mental health outcomes but this  
438 association is attenuated after adjusting for other variables in our biopsychosocial model. We  
439 further found no relationship between categories of certain diet preferences such as vegetarian or  
440 vegan and mental health. These findings support approaches in nutritional epidemiology that  
441 employ dietary pattern analyses. By taking a more sophisticated approach to covariate selection  
442 and dietary assessment, our findings add to the evidence that contrasts a widely accepted, albeit  
443 outdated, perception of vegetarians and vegans as unhealthy individuals at risk for nutrient  
444 deficiency [72,73]. This study provides a preliminary indication that the ‘win-win’ situation for  
445 planetary and somatic health of predominantly plant-based diets is not a ‘win-win-lose’ situation  
446 for mental health. Further research will be needed to confirm or refute this finding and would  
447 benefit from the inclusion of socioeconomic and cultural determinants as additional covariates of  
448 interest. For example, the issue of food security greatly impacts one’s ability to access healthy

449 foods and has been associated with major depressive disorder in US women [74]. In addition, the  
450 ability to procure culturally-appropriate foods, which has been nearly eliminated by a colonial  
451 food system, is an issue of great extent for Indigenous communities and food traditions across  
452 the globe. How this may interact with mental health is of great importance and has been  
453 neglected in the public health literature at this point. Moreover, most of the studies on this topic  
454 have thus far have been conducted in North America, Europe, or Australia. Insights from  
455 countries and cultures other than Western nations would be helpful in understanding cross-  
456 cultural differences. Integrating research from social sciences, community action and  
457 participatory research, and findings from qualitative studies would also play a pivotal role in  
458 understanding the complex relationships under investigation.

459

460

461

462 **Acknowledgements**

463 We are grateful for the support of David Gill and the University of British Columbia's SEEDS  
464 program who guided this project in an encouraging way and substantially facilitated the  
465 integrated knowledge translation and community-based approach of this research. We would also  
466 like to extend our gratitude to the members of the stakeholder group, most notably Melissa  
467 Baker-Wilson and David Speight for their enthusiasm, support, and open-mindedness. It was a  
468 true pleasure to be surrounded by these like-minded, visionary change makers.

469

**References**

- 470 1. Willett W, Rockström J, Loken B, Springmann M, Lang T, Vermeulen S, et al. Food in the  
471 Anthropocene: the EAT–Lancet Commission on healthy diets from sustainable food  
472 systems. *Lancet*. 2019 Feb 2;393(10170):447–92.
- 473 2. Whiteford HA, Degenhardt L, Rehm J, Baxter AJ, Ferrari AJ, Erskine HE, et al. Global  
474 burden of disease attributable to mental and substance use disorders: findings from the  
475 Global Burden of Disease Study 2010. *Lancet*. 2013 Nov 9;382(9904):1575–86.
- 476 3. Demyttenaere K, Bruffaerts R, Posada-Villa J, Gasquet I, Kovess V, Lepine Jp, et al.  
477 Prevalence, severity, and unmet need for treatment of mental disorders in the World Health  
478 Organization World Mental Health Surveys. *J Am Med Assoc*. 2004;291(21):2581–90.
- 479 4. Somers JM, Goldner EM, Waraich P, Hsu L. Prevalence and incidence studies of anxiety  
480 disorders: a systematic review of the literature. *Can J Psychiatry*. 2006 Feb 1;51(2):100–13.
- 481 5. DeSilva MJ, McKenzie K, Harpham T, Huttly SRA. Social capital and mental illness: a  
482 systematic review. *J Epidemiol Community Health*. 2005 Aug 1;59(8):619–27.
- 483 6. Breslau J, Lane M, Sampson N, Kessler RC. Mental disorders and subsequent educational  
484 attainment in a US national sample. *J Psychiatr Res*. 2008 Jul 1;42(9):708–16.
- 485 7. Trautmann S, Rehm J, Wittchen H-U. The economic costs of mental disorders: Do our  
486 societies react appropriately to the burden of mental disorders? *EMBO Rep*. 2016 Sep  
487 1;17(9):1245–9.
- 488 8. Alonso J, Angermeyer MC, Bernert S, Bruffaerts R, Brugha TS, Bryson H, et al. Disability  
489 and quality of life impact of mental disorders in Europe: results from the European Study of  
490 the Epidemiology of Mental Disorders (ESEMeD) project. *Acta Psychiatr Scand*.  
491 2004;109(s420):38–46.
- 492 9. Burcusa SL, Iacono WG. Risk for recurrence in depression. *Clin Psychol Rev*.  
493 2007;27(8):959–85.

- 494 10. Gibb SJ, Fergusson DM, Horwood LJ. Burden of psychiatric disorder in young adulthood  
495 and life outcomes at age 30. *Br J Psychiatry*. 2010;197(2):122–7.
- 496 11. Kessler RC, Amminger GP, Aguilar-Gaxiola S, Alonso J, Lee S, Üstün TB. Age of onset of  
497 mental disorders: a review of recent literature. *Curr Opin Psychiatry*. 2007 Jul;20(4):359.
- 498 12. Blanco C, Okuda M, Wright C, Hasin DS, Grant BF, Liu S-M, et al. Mental Health of  
499 College Students and Their Non-College-Attending Peers: results from the National  
500 Epidemiologic Study on Alcohol and Related Conditions. *Arch Gen Psychiatry*. 2008 Dec  
501 1;65(12):1429–37.
- 502 13. Prince JP. University student counseling and mental health in the United States: trends and  
503 challenges. *Ment Health Prev*. 2015 May 1;3(1):5–10.
- 504 14. Evans TM, Bira L, Gastelum JB, Weiss LT, Vanderford NL. Evidence for a mental health  
505 crisis in graduate education. *Nat Biotechnol*. 2018;36(3):282.
- 506 15. McGorry PD, Mei C. Early intervention in youth mental health: progress and future  
507 directions. *Evid Based Ment Health*. 2018 Nov 1;21(4):182–4.
- 508 16. Patton GC, Viner R. Pubertal transitions in health. *Lancet*. 2007 Mar 31;369(9567):1130–9.
- 509 17. Logan AC, Jacka FN. Nutritional psychiatry research: an emerging discipline and its  
510 intersection with global urbanization, environmental challenges and the evolutionary  
511 mismatch. *J Physiol Anthropol*. 2014 Jul 24;33(1):22.
- 512 18. Sawyer SM, Afifi RA, Bearinger LH, Blakemore S-J, Dick B, Ezech AC, et al. Adolescence:  
513 a foundation for future health. *Lancet*. 2012 Apr 28;379(9826):1630–40.
- 514 19. Flanagan R. More than 3 million Canadians vegetarian or vegan: study [Internet]. CTV  
515 News. 2018 [cited 2019 Mar 13]. Available from: [https://www.ctvnews.ca/canada/more-  
516 than-3-million-canadians-vegetarian-or-vegan-study-1.4027606](https://www.ctvnews.ca/canada/more-than-3-million-canadians-vegetarian-or-vegan-study-1.4027606)
- 517 20. Thomson A. “Mind-blowing”: Survey finds most vegans, vegetarians in Canada are under  
518 35 [Internet]. CTV News. 2018 [cited 2019 Mar 13]. Available from:  
519 [https://www.ctvnews.ca/health/mind-blowing-survey-finds-most-vegans-vegetarians-in-  
520 canada-are-under-35-1.3841041](https://www.ctvnews.ca/health/mind-blowing-survey-finds-most-vegans-vegetarians-in-canada-are-under-35-1.3841041)
- 521 21. The Nielsen Company. Plant-based proteins are gaining dollar share among North  
522 Americans [Internet]. Nielsen. 2017 [cited 2019 Mar 13]. Available from:  
523 [http://www.nielsen.com/ca/en/insights/news/2017/plant-based-proteins-are-gaining-dollar-  
524 share-among-north-americans](http://www.nielsen.com/ca/en/insights/news/2017/plant-based-proteins-are-gaining-dollar-share-among-north-americans)
- 525 22. Weersink A, Massow M von, Gallant M. Meat consumption is changing but it’s not  
526 because of vegans [Internet]. *The Conversation*. 2019 [cited 2019 Mar 13]. Available from:  
527 [http://theconversation.com/meat-consumption-is-changing-but-its-not-because-of-vegans-  
528 112332](http://theconversation.com/meat-consumption-is-changing-but-its-not-because-of-vegans-112332)



- 529 23. Derbyshire EJ. Flexitarian diets and health: a review of the evidence-based literature. *Front*  
530 *Nutr.* 2016;3:55.
- 531 24. Beezhold B, Johnston CS, Daigle DR. Vegetarian diets are associated with healthy mood  
532 states: a cross-sectional study in seventh day adventist adults. *Nutr J.* 2010;9(1):26.
- 533 25. Beezhold B, Radnitz C, Rinne A, DiMatteo J. Vegans report less stress and anxiety than  
534 omnivores. *Nutr Neurosci.* 2015 Oct 1;18(7):289–96.
- 535 26. Baines S, Powers J, Brown WJ. How does the health and well-being of young Australian  
536 vegetarian and semi-vegetarian women compare with non-vegetarians? *Public Health Nutr.*  
537 2007 May;10(5):436–42.
- 538 27. Burkert NT, Muckenhuber J, Großschädl F, Rásky É, Freidl W. Nutrition and health - The  
539 association between eating behavior and various health parameters: a matched sample  
540 study. *PLOS One.* 2014 Feb 7;9(2):e88278.
- 541 28. Dobersek U, Wy G, Adkins J, Altmeyer S, Krout K, Lavie CJ, et al. Meat and mental  
542 health: a systematic review of meat abstention and depression, anxiety, and related  
543 phenomena. *Crit Rev Food Sci Nutr.* 2020 Apr 20;0(0):1–14.
- 544 29. Hibbeln JR, Northstone K, Evans J, Golding J. Vegetarian diets and depressive symptoms  
545 among men. *J Affect Disord.* 2018;225:13–7.
- 546 30. Michalak J, Zhang XC, Jacobi F. Vegetarian diet and mental disorders: Results from a  
547 representative community survey. *Int J Behav Nutr Phys Act.* 2012 Jun 7;9:67.
- 548 31. Hu FB. Dietary pattern analysis: a new direction in nutritional epidemiology. *Curr Opin*  
549 *Lipidol.* 2002;13(1):3–9.
- 550 32. Satija A, Bhupathiraju SN, Rimm EB, Spiegelman D, Chiuve SE, Borgi L, et al. Plant-  
551 based dietary patterns and incidence of type 2 Diabetes in US men and women: Results  
552 from three prospective cohort studies. *PLOS Med.* 2016 Jun 14;13(6):e1002039.
- 553 33. Lai JS, Hiles S, Bisquera A, Hure AJ, McEvoy M, Attia J. A systematic review and meta-  
554 analysis of dietary patterns and depression in community-dwelling adults. *Am J Clin Nutr.*  
555 2014 Jan 1;99(1):181–97.
- 556 34. Lassale C, Batty GD, Baghdadli A, Jacka F, Sánchez-Villegas A, Kivimäki M, et al.  
557 Healthy dietary indices and risk of depressive outcomes: a systematic review and meta-  
558 analysis of observational studies. *Mol Psychiatry.* 2018 Sep 26;1.
- 559 35. Li Y, Lv M-R, Wei Y-J, Sun L, Zhang J-X, Zhang H-G, et al. Dietary patterns and  
560 depression risk: a meta-analysis. *Psychiatry Res.* 2017 Jul 1;253:373–82.
- 561 36. Diener E, Seligman MEP. Very happy people. *Psychol Sci.* 2002 Jan 1;13(1):81–4.

- 562 37. Karatsoreos IN, McEwen BS. Psychobiological allostasis: resistance, resilience and  
563 vulnerability. *Trends Cogn Sci*. 2011 Dec 1;15(12):576–84.
- 564 38. Paluska SA, Schwenk TL. Physical activity and mental health. *Sports Med*. 2000 Mar  
565 1;29(3):167–80.
- 566 39. Tiggemann M. Body dissatisfaction and adolescent self-esteem: prospective findings. *Body  
567 Image*. 2005 Jun 1;2(2):129–35.
- 568 40. Van Kim NA, Nelson TF. Vigorous physical activity, mental health, perceived stress, and  
569 socializing among college students. *Am J Health Promot*. 2013 Sep 1;28(1):7–15.
- 570 41. Martin W, Dixon BJ, Thomas H. Enhancing mental well-being. In: *The Handbook of Stress  
571 and Health* [Internet]. 1st ed. John Wiley & Sons, Ltd; 2017 [cited 2019 Apr 9]. p. 459–71.  
572 Available from: <http://www.onlinelibrary.wiley.com/doi/abs/10.1002/9781118993811.ch28>
- 573 42. Aarø LE, Laberg JC, Wold B. Health behaviours among adolescents: towards a hypothesis  
574 of two dimensions. *Health Educ Res*. 1995 Mar 1;10(1):83–93.
- 575 43. Conklin AI, Forouhi NG, Surtees P, Khaw K-T, Wareham NJ, Monsivais P. Social  
576 relationships and healthful dietary behaviour: evidence from over-50s in the EPIC cohort,  
577 UK. *Soc Sci Med*. 2014 Jan 1;100:167–75.
- 578 44. Leigh Gibson E. Emotional influences on food choice: sensory, physiological and  
579 psychological pathways. *Physiol Behav*. 2006 Aug 30;89(1):53–61.
- 580 45. Neely E, Walton M, Stephens C. Young people’s food practices and social relationships. A  
581 thematic synthesis. *Appetite*. 2014 Nov 1;82:50–60.
- 582 46. Neumark-Sztainer D, Paxton SJ, Hannan PJ, Haines J, Story M. Does body satisfaction  
583 matter? Five-year longitudinal associations between body satisfaction and health behaviors  
584 in adolescent females and males. *J Adolesc Health*. 2006 Aug 1;39(2):244–51.
- 585 47. Weidner G, Kohlmann C-W, Dotzauer E, Burns LR. The effects of academic stress on  
586 health behaviors in young adults. *Anx Stress Coping*. 1996;9(2):123–33.
- 587 48. Thompson FE, Midthune D, Kahle L, Dodd KW. Development and Evaluation of the  
588 National Cancer Institute’s Dietary Screener Questionnaire Scoring Algorithms123. *J Nutr*.  
589 2017 Jun;147(6):1226–33.
- 590 49. Cella D, Riley W, Stone A, Rothrock N, Reeve B, Yount S, et al. The Patient-Reported  
591 Outcomes Measurement Information System (PROMIS) developed and tested its first wave  
592 of adult self-reported health outcome item banks: 2005–2008. *J Clin Epidemiol*. 2010 Nov  
593 1;63(11):1179–94.
- 594 50. Arroll B, Goodyear-Smith F, Crengle S, Gunn J, Kerse N, Fishman T, et al. Validation of  
595 PHQ-2 and PHQ-9 to screen for major depression in the primary care population. *Ann Fam  
596 Med*. 2010 Jul 1;8(4):348–53.

- 597 51. Beard C, Hsu KJ, Rifkin LS, Busch AB, Björgvinsson T. Validation of the PHQ-9 in a  
598 psychiatric sample. *J Affect Disord.* 2016 Mar 15;193:267–73.
- 599 52. Keum BT, Miller MJ, Inkelas KK. Testing the factor structure and measurement invariance  
600 of the PHQ-9 across racially diverse U.S. college students. *Psychol Assess.*  
601 2018;30(8):1096–106.
- 602 53. Kroenke K, Spitzer RL, Williams JBW. The PHQ-9. *J Gen Intern Med.* 2001  
603 Sep;16(9):606–13.
- 604 54. Kroenke K, Spitzer RL, Williams JBW, Monahan PO, Löwe B. Anxiety disorders in  
605 primary care: prevalence, impairment, comorbidity, and detection. *Ann Intern Med.* 2007  
606 Mar 6;146(5):317.
- 607 55. Spitzer RL, Kroenke K, Williams JBW, Löwe B. A brief measure for assessing generalized  
608 anxiety disorder: the GAD-7. *Arch Intern Med.* 2006 May 22;166(10):1092–7.
- 609 56. Enders CK. *Applied Missing Data Analysis. Methodology in the Social Sciences Series.*  
610 Guilford Press; 2010.
- 611 57. Bailey RL, Mitchell DC, Miller CK, Still CD, Jensen GL, Tucker KL, et al. A dietary  
612 screening questionnaire identifies dietary patterns in older adults. *J Nutr.* 2007 Feb  
613 1;137(2):421–6.
- 614 58. Subar AF, Freedman LS, Tooze JA, Kirkpatrick SI, Boushey C, Neuhouser ML, et al.  
615 Addressing current criticism regarding the value of self-report dietary data. *J Nutr.* 2015  
616 Dec 1;145(12):2639–45.
- 617 59. Jacka FN, Pasco JA, Mykletun A, Williams LJ, Hodge AM, O’Reilly SL, et al. Association  
618 of Western and traditional diets with depression and anxiety in women. *Am J Psychiatry.*  
619 2010 Mar 1;167(3):305–11.
- 620 60. Jacka FN, Mykletun A, Berk M, Bjelland I, Tell GS. The association between habitual diet  
621 quality and the common mental disorders in community-dwelling adults: the Hordaland  
622 Health Study. *Psychosom Med.* 2011 Jul;73(6):483–90.
- 623 61. Moubarac J-C, Batal M, Martins APB, Claro R, Levy RB, Cannon G, et al. Processed and  
624 ultra-processed food products: consumption trends in Canada from 1938 to 2011. *Can J*  
625 *Diet Pract Res.* 2014 Mar 1;75(1):15–21.
- 626 62. Kaplan BJ, Rucklidge JJ, Romijn A, McLeod K. The emerging field of nutritional mental  
627 health: inflammation, the microbiome, oxidative stress, and mitochondrial function. *Clin*  
628 *Psychol Sci.* 2015 Nov 1;3(6):964–80.
- 629 63. Nettleton JA, Steffen LM, Mayer-Davis EJ, Jenny NS, Jiang R, Herrington DM, et al.  
630 Dietary patterns are associated with biochemical markers of inflammation and endothelial  
631 activation in the Multi-Ethnic Study of Atherosclerosis (MESA). *Am J Clin Nutr.* 2006 Jun  
632 1;83(6):1369–79.

- 633 64. Statistics Canada. Mental Health and Well-being profile, Canadian Community Health  
634 Survey (CCHS), by age group and sex, Canada and provinces [Internet]. 2018 [cited 2019  
635 Apr 16]. Available from:  
636 <https://www150.statcan.gc.ca/t1/tb11/en/tv.action?pid=1310009201>
- 637 65. Beiter R, Nash R, McCrady M, Rhoades D, Linscomb M, Clarahan M, et al. The prevalence  
638 and correlates of depression, anxiety, and stress in a sample of college students. *J Affect*  
639 *Disord.* 2015 Mar 1;173:90–6.
- 640 66. Kuehner C, Bueger C. Determinants of subjective quality of life in depressed patients: the  
641 role of self-esteem, response styles, and social support. *J Affect Disord.* 2005 Jun  
642 1;86(2):205–13.
- 643 67. Fahy T, Kent A, Tattan T, Horn EV, White I. Predictors of quality of life in people with  
644 severe mental illness: study methodology with baseline analysis in the UK 700 trial. *Br J*  
645 *Psychiatry.* 1999 Nov;175(5):426–32.
- 646 68. Le Port A, Gueguen A, Kesse-Guyot E, Melchior M, Lemogne C, Nabi H, et al.  
647 Association between dietary patterns and depressive symptoms over time: a 10-year follow-  
648 up study of the GAZEL cohort. *PLOS One.* 2012;7(12):e51593.
- 649 69. Jantaratnotai N, Mosikanon K, Lee Y, McIntyre RS. The interface of depression and  
650 obesity. *Obes Res Clin Pract.* 2017 Jan 1;11(1):1–10.
- 651 70. Bailey MJ, Dynarski SM. Gains and Gaps: Changing Inequality in U.S. College Entry and  
652 Completion [Internet]. National Bureau of Economic Research; 2011 Dec [cited 2019 Apr  
653 14]. Report No.: 17633. Available from: <http://www.nber.org/papers/w17633>
- 654 71. O'Malley PM, Johnston LD. Epidemiology of alcohol and other drug use among American  
655 college students. *J Stud Alcohol Suppl.* 2002 Mar 1;(s14):23–39.
- 656 72. Leitzmann C. Vegetarian nutrition: past, present, future. *Am J Clin Nutr.*  
657 2014;100(suppl\_1):496S-502S.
- 658 73. Sabaté J. The contribution of vegetarian diets to health and disease: a paradigm shift? *Am J*  
659 *Clin Nutr.* 2003 Sep 1;78(3):502S-507S.
- 660 74. Beydoun MA, Wang Y. Pathways linking socioeconomic status to obesity through  
661 depression and lifestyle factors among young US adults. *J Affect Disord.* 2010 Jun  
662 1;123(1):52–63.

### **Supporting information**

Questionnaire

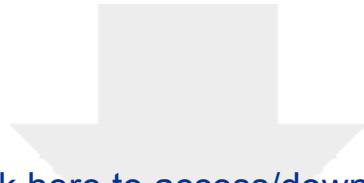

Click here to access/download

**Supporting Information**

Supporting information\_Questionnaire.pdf

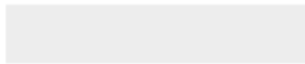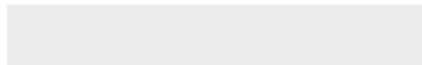

Supplement: pone.0252358.s002.pdf [file pone.0252358.s002.pdf]
